# Supplementary material
Source: Springer Nature journal article supplement (https://www.springermedizin.de/resource/supplementary/12911_2008_212_MOESM5_ESM.pdf/9527388)

Total intervention rate/1000 and PBF (%)

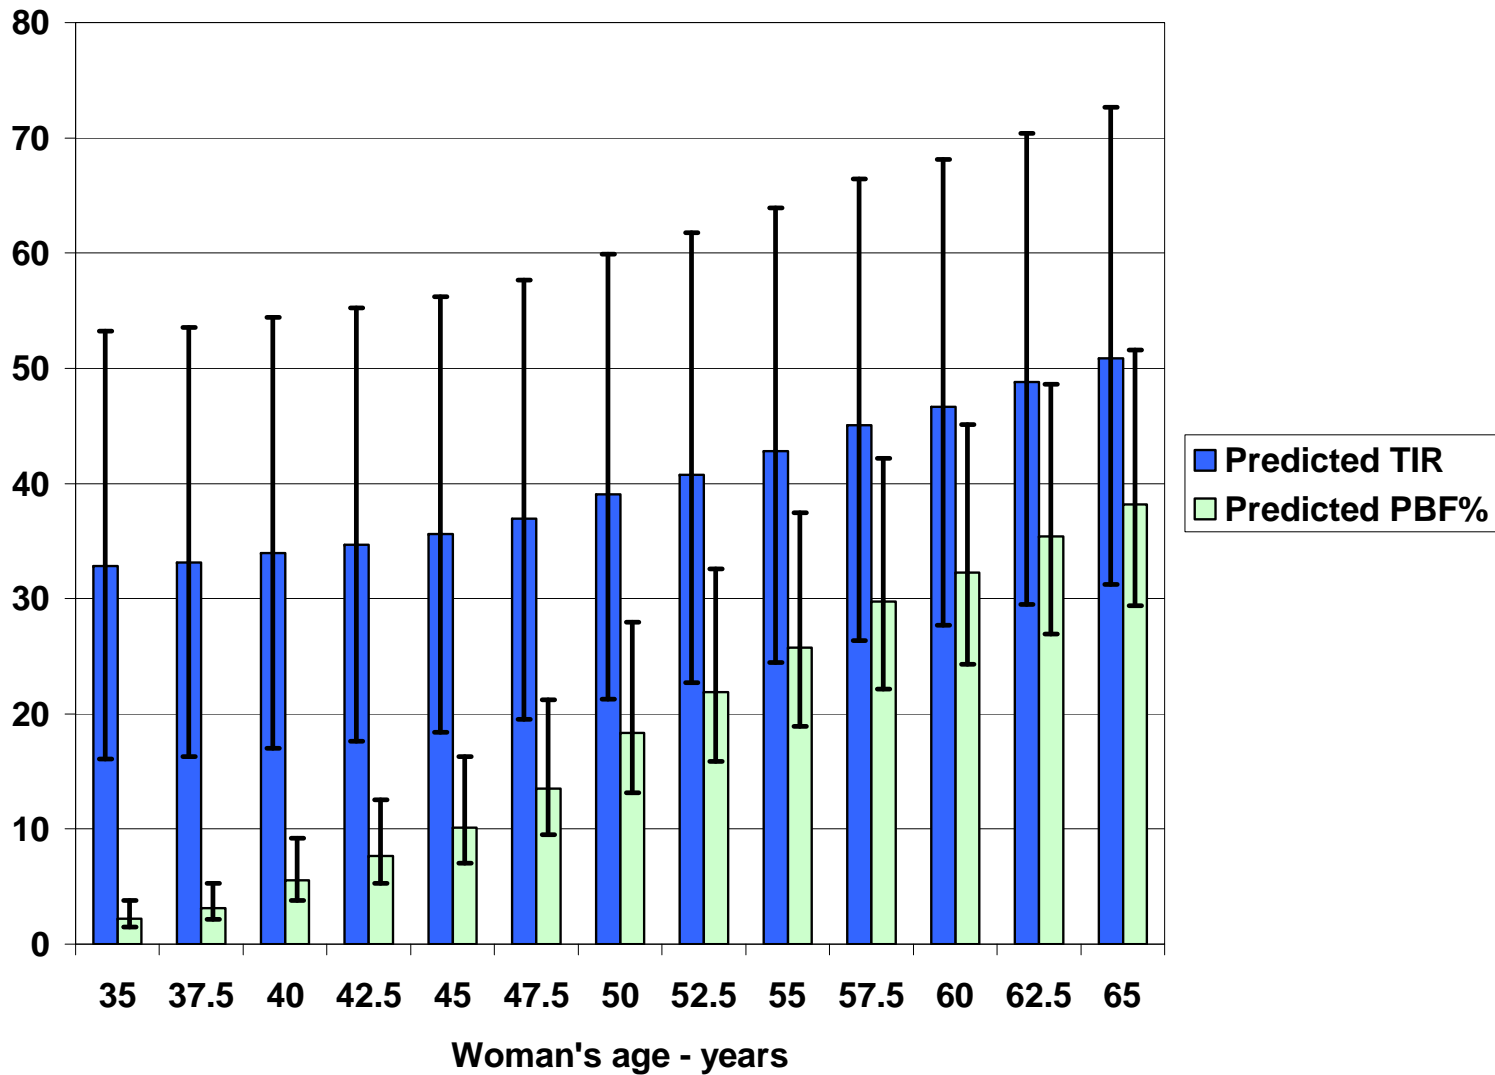

Supplement: MOESM5 [file 9527388]
